# Supplementary material for: A Lower Extremity Exoskeleton: Human-Machine Coupled Modeling, Robust Control Design, Simulation, and Overload-Carrying Experiment
Source: Hindawi journal article supplement (doi:10.1155/2015/905761), 2015-01-01
Supplement: f1 [file 905761.f1.zip]

Archive with 4 entries (3 files):
- Multimedia Attachment/
- Multimedia Attachment/Squat mode with no extern load.avi
- Multimedia Attachment/Summary for human-machine coordinated motion experiment.doc
- Multimedia Attachment/Walking mode with extern 60kg load.avi
